# Supplementary material for: Comparative Genomics of Prophages Sato and Sole Expands the Genetic Diversity Found in the Genus Betatectivirus
Source: MDPI journal article supplement (doi:10.3390/microorganisms9061335), 2021-06-19
Supplement: s1 [file s1]

## **Supplementary Material**

### **Comparative Genomics of Prophages Sato and Sole Expands the Genetic Diversity found in the Genus *Betatectivirus***

Annika Gillis \*, Louise Hock and Jacques Mahillon \*

Laboratory of Food and Environmental Microbiology, Earth and Life Institute, UCLouvain,  
Croix du Sud 2, L7.05.12, B-1348 Louvain-la-Neuve, Belgium

\* Corresponding authors:

Mailing address: Croix du Sud, 2-L7.05.12, B-1348 Louvain-la-Neuve, Belgium.

E-mail: annika.gillis@uclouvain.be (A.G.); jacques.mahillon@uclouvain.be (J.M.)

**Supplementary Material:**

**Table S1**

**Figures S1-S7**

**Table S1.** Primers used in this study.

| Phage Sato       |                             | Phage Sole       |                             |
|------------------|-----------------------------|------------------|-----------------------------|
| Primer Name      | Sequence (5' → 3')          | Primer Name      | Sequence (5' → 3')          |
| Sato-1-F         | TTTTGGTTACCTGTGTCTATAATTCTT | Sole-1-F         | TTTTTGGTTACCTGTGTCTATAATTCT |
| Sato-787-F       | GGTCATCGTGTCCGAGTCAG        | Sole-258-F       | ACGCCCCGTGTGTTTCGTATAA      |
| Sato-974-F       | ACTCGAAAATGGAGAGCGCA        | Sole-678-R       | AACGTAAAAGTTGCCACCGC        |
| Sato-995-R       | AGTGCGCTCTCCATTTTCGA        | Sole-1363-F      | GCAGAAGCAAAAAGGTGGGG        |
| Sato-2844-R      | CCCGTTTTTCCCACCGGATA        | Sole-2978-F      | ATGGCGGAATCATTTGGGGT        |
| Sato-3159-R      | TCTCATAGCAAAACGCCCCGT       | Sole-2997-R      | ACCCCAAATGATTCCGCCAT        |
| Sato-5140-F      | CTTTCGCTTGCGATTCGGAG        | 4392F *          | GGGTATATGGAAGAGTTTGG        |
| Sato-5223-R      | TCGTCATCGTCGATGTCGTC        | Sole-4846-F      | AGGAGGATGCACCACAATGG        |
| Sato-5500-R      | TCTTTTCTCTTCAGACAGTTCC      | 4940R *          | CTCCTTATCGAATGTTTG TTC      |
| Sato-6270-F      | GCGTTATTACCGCGTGTTC         | Sole-6481-F      | TGACCGTGACCGCATTGTAA        |
| Sato-7010-R      | AGTTTCAAAGTGGCGCGAAC        | Sole-6500-R      | TTACAATGCGGTCACGGTCA        |
| Sato-9100-F      | GAAGCGGGGAGAAGAAATGAGT      | Sole-6600-R      | AGTTTCAAAGTGGCGCGAAC        |
| Sato-9312-F      | TGATGACGCCGGACTTATCG        | Sole-6986-F      | ACGTTTGCGCAACTTGTTGA        |
| Sato-9331-R      | CGATAAGTCCGGCGTCATCA        | Sole-7056-R      | AACACCTCGTCCGATGTGAC        |
| Sato-9427-R      | TTCTTTTTGCGCGTCCCTTG        | Sole-9120-F      | TAAGGGGTGGCTCGGATACA        |
| Sato-11234-F     | CGAATTATGCGGGGCAACTG        | Sole-9139-R      | TGTATCCGAGCCACCCCTTA        |
| Sato-11253-R     | CAGTTGCCCCGCATAATTCG        | Sole-9817-F      | AAACTCGACCCTCCTGCAAG        |
| Sato-13392-R     | ATCGGCGGGGAATCTTGTTT        | Sole-9859-R      | TATGTTTTCCACCACCCCG         |
| Sato-13708-F     | TTACAGTAAGGCAAGCGGGG        | Sole-10389-R     | ATTTGGCGGTCCTTTTGCTT        |
| Sato-14000-R     | GTTAATTCGGTTCTCTTCGCAT      | Sole-10873-F     | AACGCCATACACCGGAGAAG        |
| Sato-14491-R     | ACACGCTTTTAAACACCCGC        | Sole-11784-F     | GTTCGTGTCTACCGAGTCC         |
|                  |                             | Sole-13807-R     | CTCCACGGTTTGCGATACCT        |
|                  |                             | Sole-14138-R     | GATTGCCATTCGCTACCACG        |
|                  |                             | Sole-14151-R     | CGTACTACCCCATGATTGCCA       |
| Sato-Ends-390R   | CACCTACTTTCAGTTCATTTTCGGT   | Sole-Ends-388R   | CCTACTTTCAGTTCATTTTCGGTTGT  |
| Sato-Ends-14570F | CGGAAGTAAAGGACAAGCGC        | Sole-Ends-14154F | TGGAGAAGGTGGATATACATGGT     |

\* From ref. [1].

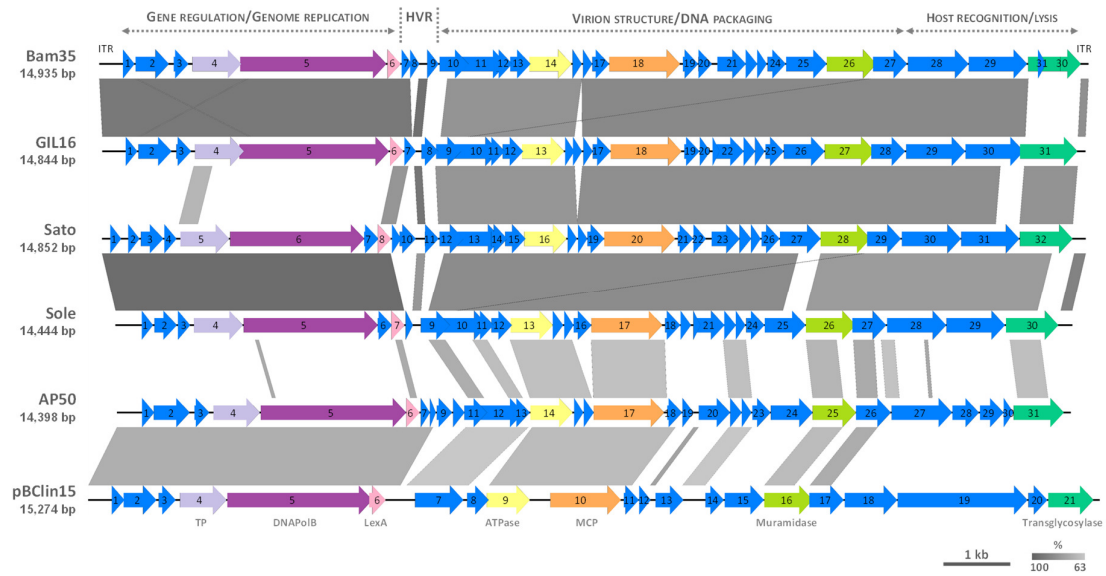

**Figure S1.** Genome comparisons of phages Sato and Sole with other betatectiviruses and the tectivirus-like element pBClin15. Predicted genes and direction of transcription are represented as block arrows. CDSs numbers are indicated inside the block arrows. Canonical tectiviral proteins and well conserved proteins among betatectiviruses are color-coded: light purple, terminal protein (TP); dark purple, B-family DNA polymerase (DNAPolB); rose, LexA transcriptional regulator; yellow, packaging ATPase (ATPase); orange, major capsid protein (MCP); light green, muramidase; dark green, transglycosylase. The other CDSs are in blue. ITR, inverted terminal repeat; HVR, highly variable region. Conserved regions are grey-shaded, with the color intensity indicating percentage of nucleotide identity. The comparisons were done by BLASTn, and similarities with E values lower than 0.001 were plotted. Scale and percentage of nucleotide identity are indicated at the bottom-right. Genome lengths in base pairs (bp) are indicated for each molecule. GenBank accession numbers are listed in Table 3.



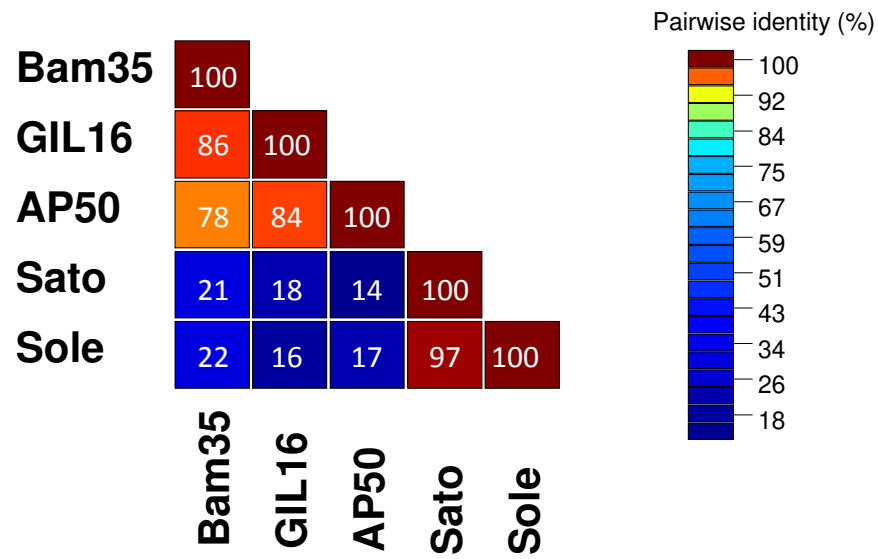

**Figure S3.** Graphical representation of percent pairwise amino acid sequence identity (in white) of the ssDNA binding protein in betatectiviruses. The color scale bar indicates the percentage of amino acid identity.

|               |                                                                                 |
|---------------|---------------------------------------------------------------------------------|
|               | .... .... .... .... .... .... .... .... .... .... .... .... .... .... .... .... |
|               | 10 20 30 40 50 60 70                                                            |
| <b>Bam35c</b> | MANKRLKKKL ETKRKSSLV SEG-YSKKET KKLKGRELET VYKKKAHNRK NRERAREIAN LAKQWGLSPS     |
| <b>GIL01</b>  | MANKRLKKKL ETKRKSSLV SEG-YSKKET KKLKGRELET VYKKKAHNRK NRERAREIAN LAKQWGLSPS     |
| <b>GIL16c</b> | MANKRLKKKL ETKRKSSLV SEG-YSKKET KKLKGRELET VYKKKAHNRK NRERAREIAN LARQWGLSPS     |
| <b>AP50</b>   | MANKRQRKKI VKKKQESFLS SVG-YSKKQM KTISTTDRAK VVKKETYKKK KRDYHQARS MGFGS-KEAN     |
| <b>Sato</b>   | MAKKRIKKKL EKKKKISLLL SDSSVSKKET KRLKGRELDV VYKQVNQRVK NRERARAISA EAKRWGLSPT    |
| <b>Sole</b>   | MAKKRIKKKL EKKKKISLLL SDSSVSKKET KRLKGRELDV VYKQVNQRVK NRERARAISA EAKRWGLSPT    |

  

|               |                                                                                 |
|---------------|---------------------------------------------------------------------------------|
|               | .... .... .... .... .... .... .... .... .... .... .... .... .... .... .... .... |
|               | 80 90 100 110 120 130 140                                                       |
| <b>Bam35c</b> | KYNSWKKLLP EIERIKKEQD RE-----APF LLIYYQDFTG ETDSKFIYDF KKRNNTRSRS               |
| <b>GIL01</b>  | KYNSWKKLLP EIERIKKEQD RE-----APF LLIYYQDFTG ETDSKFIYDF KKRNNTRSRS               |
| <b>GIL16c</b> | KFNSWKKLLP EIERIKKEQD RE-----APF LVIYYQDFTG ETDSKFIYDF KKRTNTRSRS               |
| <b>AP50</b>   | KMSSWSDSR- -FIKYIEEFN -----SY Y MIVMYKDVTE ETDSEALHMI KNHTKRRSTS                |
| <b>Sato</b>   | KFNSWKKLLP EIERKKKEIA KEEKREEQRR KRAERNKGKA LYVFWTDTQG HSLEEWDRQR DQVEHIYSVH    |
| <b>Sole</b>   | KFNSWKKLLP EIERKKKEIA KEEKREEQRR KRAERNKGKA LYVFWTDTQG HSLEEWDRQR DQVEHIYSVH    |

  

|               |                                                                              |
|---------------|------------------------------------------------------------------------------|
|               | .... .... .... .... .... .... .... .... .... .... *... .... .... .... ....   |
|               | 150 160 170 180 190 200 210                                                  |
| <b>Bam35c</b> | QITESIIGWL QNAHNKFLG R---VAIRIV PKRDVSKTNT LWRNHGYVKI YEGQGKELSK LLTAIETIMV  |
| <b>GIL01</b>  | QITESIIGWL QNAHNKFLG R---VAIRIV PKRDVSKTNT LWRNHGYVKI YEGQGKELSK LLTAIETIMV  |
| <b>GIL16c</b> | QITRSIIGWL QNAQNKLFLG R---VAMRIV PKRDVSKTNT LWRNHGYVKI YEGQGKELTK LLTAIETIMV |
| <b>AP50</b>   | NLLRSIKGWL SVDKNQGYIG G---YEIQVG KKDEIDFHL YAYQQRKYLQA YRGQGLQLKP LLNLLNMMV  |
| <b>Sato</b>   | GEEGLRSHIK STIHDRLGIP TGACDAPQIV DKSQIELTN YYYADGWREV YSGKCRYWLP ILKLIATMMT  |
| <b>Sole</b>   | GEEGLRSHIK STIHDRLGIP TGACDAPQIV DKSQIELTN YYYADGWREV YSGKCRYWLP ILKLIATMMT  |

  

|               |                                                                    |
|---------------|--------------------------------------------------------------------|
|               | ..*... .... .... .... .... .... .... .... .... .... .... .... .... |
|               | 220 230 240 250 260                                                |
| <b>Bam35c</b> | GVYDVKERDK YLKELVAKLR SLPYEKAKKN AKEIQKIYDT KSYKESWDN DDYY         |
| <b>GIL01</b>  | GVYDVKERDK YLKELVAKLR SLPYEKAKKN AKEIQKIYDT KSYKESWDN DDYY         |
| <b>GIL16c</b> | GVYDVKDRDK YLKQLLNNLR SLPYKQAHN ANEIQKIYDT KSYKESWDN DEYY          |
| <b>AP50</b>   | LLYMVEAKDQ FVEDLCTNLR KLPYEQAHN ANYIEEFIT DRSDLHF---               |
| <b>Sato</b>   | ALYKPEDKLQ FVLDLSAEVD YFSNEFAERI HGLIY-----                        |
| <b>Sole</b>   | ALYKPEDKLQ FVLDLAAEVD YFSNEFAERI HGLIY-----                        |

**Figure S4.** Multiple sequence alignment of betatectiviruses terminal proteins (TPs). Sequences were aligned using CLUSTAL W. Asterisks highlight Bam35 TP residues Y172 (in blue) and Y194 (in red) which are conserved among analyzed betatectiviruses, including Sato and Sole. For phage Bam35, conserved residues Y172 and Y194 have been shown to be the priming residue for DNA replication and be involved in the interaction with the DNA polymerase, respectively [3]. The ruler represents amino acids in the multiple sequence alignment. GenBank accession numbers for TPs used in the multiple sequence alignment are: Bam35c, NP\_943750; GIL01, CAD59945; GIL16, YP\_224102; AP50, YP\_002302516; Sato, QWE49625; Sole, QWE49656.

**(a) Genome ends**

Sato  
5' **TTTTGGTTACCTGTGTCTATAATTCTTA** .... **TAATAGATAGAGAGAGCTAACCAAAAA** 3'  
5' **TTTTGGTTACCTGTGTCTATAATTCTTA** .... **TAATAGATAGAGAGAGCTAACCAAAAA** 3'  
Sole

**(b) Possible replication mechanisms**

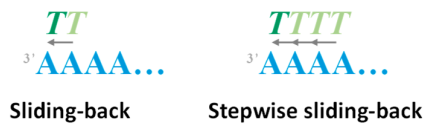

**Figure S5.** (a) Genome ends sequences of betatectiviruses Sato and Sole and (b) schematic representation of the possible early steps involved in the protein-primed replication of these phages (adapted from [3]).

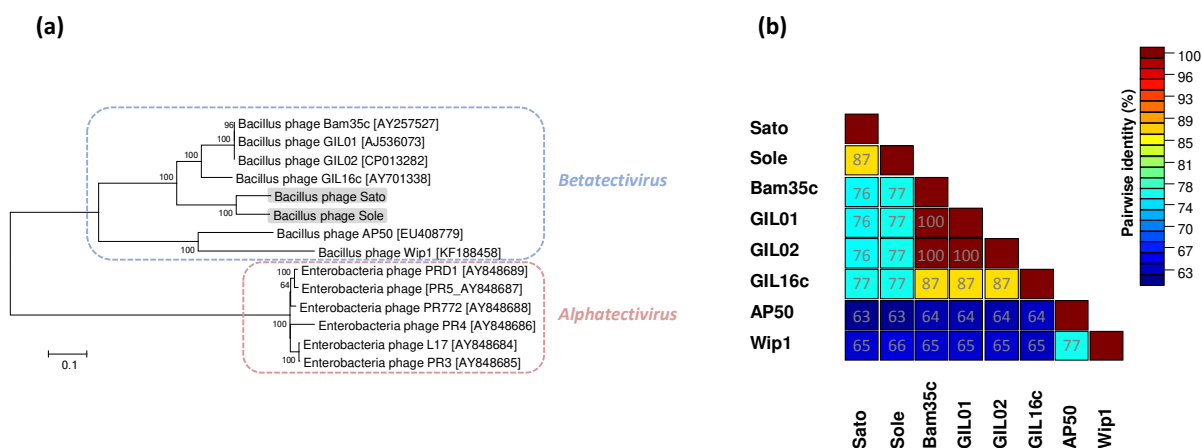

**Figure S6.** Phylogenetic relationships of phages Sato and Sole with other alphatectiviruses and betatectiviruses. **a)** Maximum likelihood tree showing the genetic relationships among the complete sequenced tectiviruses belonging to the genera *Alphatectivirus* and *Betatectivirus*. The general time-reversible plus gamma model of nucleotide substitution was used to build the phylogenetic tree based on complete nucleotide sequences. Bootstrap values (1,000 iterations) above 60% are indicated for each node. GenBank accession numbers are given in brackets. The rose and blue dotted boxes highlight phages belonging to genera *Alphatectivirus* and *Betatectivirus*, respectively. **b)** Graphical representation of percentage of pairwise nucleotide identity (in grey) among fully-sequenced *Betatectivirus*. The color scale bar indicates the percentage of nucleotide identity.

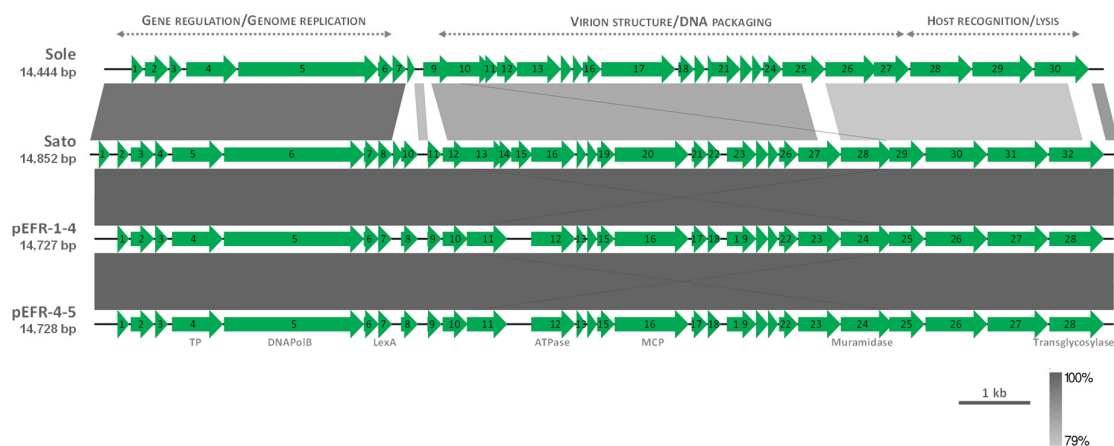

**Figure S7.** Genome comparisons of phages Sato and Sole with *B. cereus s.l.* plasmids pEFR-1-4 and pEFR-4-5. Predicted genes and direction of transcription are represented as green block arrows. CDSs numbers are indicated inside the block arrows. Conserved regions are grey-shaded, with the color intensity indicating the percentage of nucleotide identity from pairwise BLASTn. Scale and percentage of nucleotide identity are indicated at the bottom-right. Genome lengths in base pairs (bp) are indicated for each molecule. GenBank accession numbers are listed in Table 3.

## References

1. Jalasvuori, M.; Palmu, S.; Gillis, A.; Kokko, H.; Mahillon, J.; Bamford, J.K.H.; Fornelos, N. Identification of five novel tectiviruses in *Bacillus* strains: Analysis of a highly variable region generating genetic diversity. *Res. Microbiol.* **2013**, *164*, 118-126.
2. Kelley, L.A.; Mezulis, S.; Yates, C.M.; Wass, M.N.; Sternberg, M.J.E. The Phyre2 web portal for protein modeling, prediction and analysis. *Nat. Protoc.* **2015**, *10*, 845-858.
3. Berjón-Otero, M.; Villar, L.; Salas, M.; Redrejo-Rodríguez, M. Disclosing early steps of protein-primed genome replication of the gram-positive tectivirus Bam35. *Nucleic Acids Res.* **2016**, *44*, 9733-9744.
